# Supplementary material for: Calf Diarrhea Caused by Prolonged Expansion of Autochthonous Gut Enterobacteriaceae and Their Lytic Bacteriophages
Source: PubMed Central journal article supplement (PMC8546982; doi:10.1128/msystems.00816-20), 2021-03-02
Supplement: msystems.00816-20-st001.pdf [file msystems.00816-20-st001.pdf]

**TABLE S1** Calf age and sex, and moisture content of the collected samples.

| Sample ID | Status | n | Sex    | Age<br>(day after birth) | Moisture<br>content (%) | Analysis type                                    |
|-----------|--------|---|--------|--------------------------|-------------------------|--------------------------------------------------|
| N1        | Normal | 1 | Female | 27                       | 53.68                   | RNA-Seq, 16S rRNA sequencing, and diagnostic PCR |
| N2        | Normal | 1 | Female | 48                       | 65.60                   | RNA-Seq, 16S rRNA sequencing, and diagnostic PCR |
| N3        | Normal | 1 | Male   | 24                       | 73.72                   | RNA-Seq, 16S rRNA sequencing, and diagnostic PCR |
| N4        | Normal | 1 | Male   | 24                       | 65.53                   | RNA-Seq, 16S rRNA sequencing, and diagnostic PCR |
| N5        | Normal | 1 | Female | 35                       | 67.47                   | RNA-Seq, 16S rRNA sequencing, and diagnostic PCR |
| N6        | Normal | 1 | Female | 22                       | 56.42                   | RNA-Seq, 16S rRNA sequencing, and diagnostic PCR |
| N7        | Normal | 1 | Male   | 42                       | 50.21                   | RNA-Seq, 16S rRNA sequencing, and diagnostic PCR |
| N8        | Normal | 1 | Female | 28                       | 52.78                   | RNA-Seq, 16S rRNA sequencing, and diagnostic PCR |
| N9        | Normal | 1 | Male   | 33                       | 77.58                   | RNA-Seq, 16S rRNA sequencing, and diagnostic PCR |
| N10       | Normal | 1 | Female | 15                       | 51.19                   | 16S rRNA sequencing and diagnostic PCR           |
| N11       | Normal | 1 | Female | 15                       | 60.43                   | 16S rRNA sequencing and diagnostic PCR           |
| N12       | Normal | 1 | Female | 19                       | 60.01                   | 16S rRNA sequencing and diagnostic PCR           |
| N13       | Normal | 1 | Male   | 10                       | 56.49                   | 16S rRNA sequencing and diagnostic PCR           |
| N14       | Normal | 1 | Male   | 11                       | 53.12                   | 16S rRNA sequencing and diagnostic PCR           |
| N15       | Normal | 1 | Female | 21                       | 53.90                   | 16S rRNA sequencing and diagnostic PCR           |
| N16       | Normal | 1 | Female | 16                       | 64.08                   | 16S rRNA sequencing and diagnostic PCR           |
| N17       | Normal | 1 | Male   | 17                       | 51.13                   | 16S rRNA sequencing and diagnostic PCR           |
| N18       | Normal | 1 | Female | 15                       | 54.98                   | 16S rRNA sequencing and diagnostic PCR           |
| N19       | Normal | 1 | Male   | 15                       | 53.74                   | 16S rRNA sequencing and diagnostic PCR           |
| N20       | Normal | 1 | Male   | 11                       | 53.22                   | 16S rRNA sequencing and diagnostic PCR           |
| N21       | Normal | 1 | Female | 22                       | 52.93                   | 16S rRNA sequencing and diagnostic PCR           |
| N22       | Normal | 1 | Female | 20                       | 51.16                   | 16S rRNA sequencing and diagnostic PCR           |
| N23       | Normal | 1 | Female | 19                       | 58.55                   | 16S rRNA sequencing and diagnostic PCR           |
| N24       | Normal | 1 | Male   | 18                       | 57.32                   | 16S rRNA sequencing and diagnostic PCR           |
| N25       | Normal | 1 | Male   | 18                       | 54.09                   | 16S rRNA sequencing and diagnostic PCR           |
| N26       | Normal | 1 | Male   | 11                       | 53.87                   | 16S rRNA sequencing and diagnostic PCR           |
| N27       | Normal | 1 | Male   | 29                       | 59.82                   | 16S rRNA sequencing and diagnostic PCR           |
| N28       | Normal | 1 | Female | 22                       | 54.52                   | 16S rRNA sequencing and diagnostic PCR           |
| N29       | Normal | 1 | Male   | 24                       | 52.69                   | 16S rRNA sequencing and diagnostic PCR           |
| N30       | Normal | 1 | Female | 28                       | 53.19                   | 16S rRNA sequencing and diagnostic PCR           |
| N31       | Normal | 1 | Male   | 13                       | 63.51                   | 16S rRNA sequencing and diagnostic PCR           |
| N32       | Normal | 1 | Male   | 14                       | 57.48                   | 16S rRNA sequencing and diagnostic PCR           |
| N33       | Normal | 1 | Male   | 20                       | 58.22                   | 16S rRNA sequencing and diagnostic PCR           |
| N34       | Normal | 1 | Male   | 17                       | 53.54                   | 16S rRNA sequencing and diagnostic PCR           |
| N35       | Normal | 1 | Male   | 27                       | 59.25                   | 16S rRNA sequencing and diagnostic PCR           |
| N36       | Normal | 1 | Female | 15                       | 58.48                   | 16S rRNA sequencing and diagnostic PCR           |
| N37       | Normal | 1 | Female | 26                       | 54.22                   | 16S rRNA sequencing and diagnostic PCR           |
| N38       | Normal | 1 | Male   | 13                       | 60.29                   | 16S rRNA sequencing and diagnostic PCR           |
| N39       | Normal | 1 | Female | 15                       | 50.38                   | 16S rRNA sequencing and diagnostic PCR           |
| N40       | Normal | 1 | Male   | 16                       | 52.62                   | 16S rRNA sequencing and diagnostic PCR           |
| N41       | Normal | 1 | Male   | 13                       | 51.87                   | 16S rRNA sequencing and diagnostic PCR           |
| N42       | Normal | 1 | Female | 15                       | 58.64                   | 16S rRNA sequencing and diagnostic PCR           |
| N43       | Normal | 1 | Female | 11                       | 56.92                   | 16S rRNA sequencing and diagnostic PCR           |
| N44       | Normal | 1 | Male   | 21                       | 54.00                   | 16S rRNA sequencing and diagnostic PCR           |
| N45       | Normal | 1 | Female | 25                       | 54.83                   | 16S rRNA sequencing and diagnostic PCR           |

|     |          |   |        |    |       |                                                  |
|-----|----------|---|--------|----|-------|--------------------------------------------------|
| N46 | Normal   | 1 | Male   | 18 | 56.99 | 16S rRNA sequencing and diagnostic PCR           |
| N47 | Normal   | 1 | Male   | 22 | 53.27 | 16S rRNA sequencing and diagnostic PCR           |
| N48 | Normal   | 1 | Male   | 20 | 54.54 | 16S rRNA sequencing and diagnostic PCR           |
| N49 | Normal   | 1 | Female | 24 | 54.68 | 16S rRNA sequencing and diagnostic PCR           |
| N50 | Normal   | 1 | Male   | 34 | 54.29 | 16S rRNA sequencing and diagnostic PCR           |
| N51 | Normal   | 1 | Male   | 31 | 60.38 | 16S rRNA sequencing and diagnostic PCR           |
| N52 | Normal   | 1 | Female | 36 | 59.27 | 16S rRNA sequencing and diagnostic PCR           |
| N53 | Normal   | 1 | Male   | 48 | 53.12 | 16S rRNA sequencing and diagnostic PCR           |
| D1  | Diarrhea | 1 | Male   | 34 | 90.63 | RNA-Seq, 16S rRNA sequencing, and diagnostic PCR |
| D2  | Diarrhea | 1 | Male   | 34 | 89.19 | RNA-Seq, 16S rRNA sequencing, and diagnostic PCR |
| D3  | Diarrhea | 1 | Female | 24 | 93.18 | RNA-Seq, 16S rRNA sequencing, and diagnostic PCR |
| D4  | Diarrhea | 1 | Male   | 34 | 92.85 | RNA-Seq, 16S rRNA sequencing, and diagnostic PCR |
| D5  | Diarrhea | 1 | Male   | 29 | 95.85 | RNA-Seq, 16S rRNA sequencing, and diagnostic PCR |
| D6  | Diarrhea | 1 | Male   | 31 | 89.65 | RNA-Seq, 16S rRNA sequencing, and diagnostic PCR |
| D7  | Diarrhea | 1 | Female | 22 | 90.33 | RNA-Seq, 16S rRNA sequencing, and diagnostic PCR |
| D8  | Diarrhea | 1 | Female | 33 | 95.76 | RNA-Seq, 16S rRNA sequencing, and diagnostic PCR |
| D9  | Diarrhea | 1 | Male   | 22 | 94.80 | RNA-Seq, 16S rRNA sequencing, and diagnostic PCR |
| D10 | Diarrhea | 1 | Male   | 16 | 92.38 | 16S rRNA sequencing and diagnostic PCR           |
| D11 | Diarrhea | 1 | Female | 16 | 88.12 | 16S rRNA sequencing and diagnostic PCR           |
| D12 | Diarrhea | 1 | Male   | 17 | 89.39 | 16S rRNA sequencing and diagnostic PCR           |
| D13 | Diarrhea | 1 | Female | 15 | 91.55 | 16S rRNA sequencing and diagnostic PCR           |
| D14 | Diarrhea | 1 | Male   | 11 | 92.78 | 16S rRNA sequencing and diagnostic PCR           |
| D15 | Diarrhea | 1 | Male   | 21 | 92.53 | 16S rRNA sequencing and diagnostic PCR           |
| D16 | Diarrhea | 1 | Female | 25 | 92.85 | 16S rRNA sequencing and diagnostic PCR           |
| D17 | Diarrhea | 1 | Male   | 28 | 90.11 | 16S rRNA sequencing and diagnostic PCR           |
| D18 | Diarrhea | 1 | Female | 24 | 91.67 | 16S rRNA sequencing and diagnostic PCR           |
| D19 | Diarrhea | 1 | Male   | 20 | 91.03 | 16S rRNA sequencing and diagnostic PCR           |
| D20 | Diarrhea | 1 | Male   | 9  | 94.12 | 16S rRNA sequencing and diagnostic PCR           |
| D21 | Diarrhea | 1 | Male   | 16 | 93.79 | 16S rRNA sequencing and diagnostic PCR           |
| D22 | Diarrhea | 1 | Female | 15 | 92.88 | 16S rRNA sequencing and diagnostic PCR           |
| D23 | Diarrhea | 1 | Female | 23 | 92.64 | 16S rRNA sequencing and diagnostic PCR           |
| D24 | Diarrhea | 1 | Male   | 19 | 91.10 | 16S rRNA sequencing and diagnostic PCR           |
| D25 | Diarrhea | 1 | Male   | 21 | 85.17 | 16S rRNA sequencing and diagnostic PCR           |
| D26 | Diarrhea | 1 | Female | 27 | 88.14 | 16S rRNA sequencing and diagnostic PCR           |
| D27 | Diarrhea | 1 | Female | 17 | 91.55 | 16S rRNA sequencing and diagnostic PCR           |
| D28 | Diarrhea | 1 | Female | 10 | 89.30 | 16S rRNA sequencing and diagnostic PCR           |
| D29 | Diarrhea | 1 | Male   | 21 | 87.11 | 16S rRNA sequencing and diagnostic PCR           |
| D30 | Diarrhea | 1 | Male   | 28 | 94.16 | 16S rRNA sequencing and diagnostic PCR           |
| D31 | Diarrhea | 1 | Female | 22 | 91.01 | 16S rRNA sequencing and diagnostic PCR           |
| D32 | Diarrhea | 1 | Female | 29 | 92.55 | 16S rRNA sequencing and diagnostic PCR           |
| D33 | Diarrhea | 1 | Male   | 21 | 92.93 | 16S rRNA sequencing and diagnostic PCR           |
| D34 | Diarrhea | 1 | Female | 24 | 89.75 | 16S rRNA sequencing and diagnostic PCR           |
| D35 | Diarrhea | 1 | Male   | 31 | 88.96 | 16S rRNA sequencing and diagnostic PCR           |
| D36 | Diarrhea | 1 | Male   | 25 | 91.74 | 16S rRNA sequencing and diagnostic PCR           |
| D37 | Diarrhea | 1 | Male   | 25 | 92.66 | 16S rRNA sequencing and diagnostic PCR           |
| D38 | Diarrhea | 1 | Female | 25 | 92.19 | 16S rRNA sequencing and diagnostic PCR           |
| D39 | Diarrhea | 1 | Male   | 25 | 90.10 | 16S rRNA sequencing and diagnostic PCR           |
| D40 | Diarrhea | 1 | Male   | 13 | 91.37 | 16S rRNA sequencing and diagnostic PCR           |

|                 |              |   |         |         |         |                                        |
|-----------------|--------------|---|---------|---------|---------|----------------------------------------|
| D41             | Diarrhea     | 1 | Female  | 19      | 94.88   | 16S rRNA sequencing and diagnostic PCR |
| D42             | Diarrhea     | 1 | Female  | 29      | 93.65   | 16S rRNA sequencing and diagnostic PCR |
| D43             | Diarrhea     | 1 | Female  | 14      | 91.12   | 16S rRNA sequencing and diagnostic PCR |
| D44             | Diarrhea     | 1 | Male    | 13      | 92.33   | 16S rRNA sequencing and diagnostic PCR |
| D45             | Diarrhea     | 1 | Female  | 13      | 90.08   | 16S rRNA sequencing and diagnostic PCR |
| D46             | Diarrhea     | 1 | Male    | 18      | 89.36   | 16S rRNA sequencing and diagnostic PCR |
| D47             | Diarrhea     | 1 | Male    | 19      | 88.16   | 16S rRNA sequencing and diagnostic PCR |
| D48             | Diarrhea     | 1 | Female  | 22      | 84.39   | 16S rRNA sequencing and diagnostic PCR |
| D49             | Diarrhea     | 1 | Female  | 22      | 91.28   | 16S rRNA sequencing and diagnostic PCR |
| D50             | Diarrhea     | 1 | Male    | 21      | 91.12   | 16S rRNA sequencing and diagnostic PCR |
| D51             | Diarrhea     | 1 | Female  | 29      | 91.71   | 16S rRNA sequencing and diagnostic PCR |
| D52             | Diarrhea     | 1 | Male    | 31      | 91.44   | 16S rRNA sequencing and diagnostic PCR |
| D53             | Diarrhea     | 1 | Female  | 24      | 90.48   | 16S rRNA sequencing and diagnostic PCR |
| <i>p</i> -value | -            | - | 0.4985* | 0.1460* | 0.0095§ | -                                      |
| #ND1            | N-D repeated | 5 | Male    | 14-29   | N/A     | 16S rRNA sequencing                    |
| #ND2            | N-D repeated | 5 | Female  | 27-42   | N/A     | 16S rRNA sequencing                    |
| #ND3            | N-D repeated | 5 | Male    | 15-30   | N/A     | 16S rRNA sequencing                    |
| #ND4            | N-D repeated | 4 | Female  | 19-26   | N/A     | 16S rRNA sequencing                    |
| #ND5            | N-D repeated | 4 | Male    | 14-21   | N/A     | 16S rRNA sequencing                    |

Abbreviations: N, normal; D, diarrhea.

\*The data were analyzed using the non-parametric Mann-Whitney *U* test (one-tailed).

§The data were analyzed using the Chi-square test.

#Animals with repeated normal diarrhea.
