# Supplementary material for: Calf Diarrhea Caused by Prolonged Expansion of Autochthonous Gut Enterobacteriaceae and Their Lytic Bacteriophages
Source: PubMed Central journal article supplement (PMC8546982; doi:10.1128/msystems.00816-20), 2021-03-02
Supplement: msystems.00816-20-st003.pdf [file msystems.00816-20-st003.pdf]

**TABLE S3** Taxonomic annotation data for the negative control.

| OTU ID     | The number of reads |           | Taxonomy (QHIME)                                                                                            |
|------------|---------------------|-----------|-------------------------------------------------------------------------------------------------------------|
|            | *Negative1          | Negative2 |                                                                                                             |
| 109057     | 9                   | 0         | p_Proteobacteria; c_Deltaproteobacteria; o_Myxococcales; f_0319-6G20; g_ ; s_                               |
| denovo_70  | 0                   | 2         | p_Proteobacteria; c_Gammaproteobacteria; o_Pseudomonadales; f_Moraxellaceae; g_Acinetobacter; s_            |
| denovo_71  | 0                   | 1         | p_Proteobacteria; c_Gammaproteobacteria; o_Pseudomonadales; f_Moraxellaceae; g_Acinetobacter; s_            |
| 1033426    | 19                  | 0         | p_Actinobacteria; c_Actinobacteria; o_Actinomycetales; f_Nocardioideaceae; g_Nocardioideae; s_              |
| 572237     | 13                  | 0         | p_Fusobacteria; c_Fusobacteriia; o_Fusobacteriales; f_Fusobacteriaceae; g_Fusobacterium; s_                 |
| denovo_91  | 0                   | 1         | p_Proteobacteria; c_Gammaproteobacteria; o_Pseudomonadales; f_Moraxellaceae; g_Acinetobacter; s_            |
| denovo_26  | 0                   | 6         | p_Proteobacteria; c_Gammaproteobacteria; o_Pseudomonadales; f_Moraxellaceae; g_Acinetobacter; s_            |
| denovo_20  | 0                   | 1         | p_Proteobacteria; c_Gammaproteobacteria; o_Pseudomonadales; f_Moraxellaceae; g_Acinetobacter; s_            |
| 1144747    | 23                  | 0         | p_Bacteroidetes; c_Flavobacteriia; o_Flavobacteriales; f_[Weeksellaceae]; g_Chryseobacterium; s_            |
| 992354     | 20                  | 19        | p_Actinobacteria; c_Actinobacteria; o_Actinomycetales; f_Propionibacteriaceae; g_Propionibacterium; s_acnes |
| 4458848    | 6                   | 0         | p_Proteobacteria; c_Deltaproteobacteria; o_Myxococcales; f_0319-6G20; g_ ; s_                               |
| 50109      | 0                   | 15        | p_Verrucomicrobia; c_[Pedosphaerae]; o_[Pedosphaerales]; f_Ellin517; g_ ; s_                                |
| 3574065    | 0                   | 1         | p_Cyanobacteria; c_Chloroplast; o_Streptophyta; f_ ; g_ ; s_                                                |
| 515265     | 0                   | 1         | p_Proteobacteria; c_Gammaproteobacteria; o_Pseudomonadales; f_Moraxellaceae; g_Acinetobacter; s_            |
| denovo_139 | 0                   | 1         | p_Proteobacteria; c_Gammaproteobacteria; o_Pseudomonadales; f_Moraxellaceae; g_Acinetobacter; s_            |
| 4458619    | 0                   | 2         | p_Actinobacteria; c_Actinobacteria; o_Actinomycetales; f_Dermacoccaceae; g_Dermacoccus; s_                  |
| 992510     | 0                   | 2         | p_Proteobacteria; c_Alphaproteobacteria; o_Sphingomonadales; f_Sphingomonadaceae; g_ ; s_                   |
| 588097     | 4                   | 0         | p_Proteobacteria; c_Gammaproteobacteria; o_Xanthomonadales; f_Xanthomonadaceae; g_Stenotrophomonas; s_      |
| 646549     | 0                   | 15        | p_Proteobacteria; c_Gammaproteobacteria; o_Pseudomonadales; f_Pseudomonadaceae; g_Pseudomonas; s_           |
| 1108960    | 0                   | 22        | p_Proteobacteria; c_Alphaproteobacteria; o_Sphingomonadales; f_Sphingomonadaceae; g_Sphingomonas; s_        |
| 1131954    | 15                  | 0         | p_Cyanobacteria; c_Synechococcophycideae; o_Pseudanabaenales; f_Pseudanabaenaceae; g_ ; s_                  |
| 3774028    | 21                  | 0         | p_Proteobacteria; c_Alphaproteobacteria; o_Caulobacteriales; f_Caulobacteraceae; g_ ; s_                    |
| 113674     | 34                  | 0         | p_Bacteroidetes; c_Sphingobacteriia; o_Sphingobacteriales; f_ ; g_ ; s_                                     |
| 1091060    | 0                   | 16        | p_Proteobacteria; c_Alphaproteobacteria; o_Sphingomonadales; f_Sphingomonadaceae; g_Sphingomonas; s_        |
| 2307137    | 0                   | 2         | p_Cyanobacteria; c_Chloroplast; o_Streptophyta; f_ ; g_ ; s_                                                |
| denovo_49  | 0                   | 15        | p_Proteobacteria; c_Alphaproteobacteria; o_ ; f_ ; g_ ; s_                                                  |
| denovo_47  | 0                   | 1         | p_Proteobacteria; c_Gammaproteobacteria; o_Pseudomonadales; f_Moraxellaceae; g_Acinetobacter; s_            |
| 591966     | 31                  | 2         | p_Cyanobacteria; c_4C0d-2; o_MLE1-12; f_ ; g_ ; s_                                                          |
| 1106466    | 44                  | 0         | p_Bacteroidetes; c_Cytophagia; o_Cytophagales; f_Flammeovirgaceae; g_ ; s_                                  |
| 498063     | 0                   | 10        | p_Proteobacteria; c_Gammaproteobacteria; o_Xanthomonadales; f_Xanthomonadaceae; g_Luteimonas; s_            |
| 287179     | 0                   | 4         | p_Proteobacteria; c_Betaproteobacteria; o_Burkholderiales; f_Comamonadaceae; g_ ; s_                        |
| 68458      | 0                   | 3         | p_Proteobacteria; c_Alphaproteobacteria; o_Rhizobiales; f_Methylobacteriaceae; g_Methylobacterium; s_       |
| denovo_65  | 0                   | 1         | p_Proteobacteria; c_Betaproteobacteria; o_Burkholderiales; f_Comamonadaceae; g_Delftia; s_                  |
| denovo_64  | 0                   | 1         | p_Proteobacteria; c_Gammaproteobacteria; o_Pseudomonadales; f_Moraxellaceae; g_Acinetobacter; s_            |
| denovo_89  | 0                   | 7         | p_Proteobacteria; c_Betaproteobacteria; o_Burkholderiales; f_Comamonadaceae; g_Acidovorax                   |
| denovo_88  | 0                   | 1         | p_Proteobacteria; c_Gammaproteobacteria; o_Pseudomonadales; f_Moraxellaceae; g_Acinetobacter; s_            |
| 1640195    | 24                  | 0         | p_Proteobacteria; c_Alphaproteobacteria; o_Rhodospirillales; f_Rhodospirillaceae; g_ ; s_                   |
| denovo_12  | 0                   | 2         | p_Proteobacteria; c_Gammaproteobacteria; o_Pseudomonadales; f_Moraxellaceae; g_Acinetobacter; s_            |
| 627435     | 5                   | 0         | p_Proteobacteria; c_Deltaproteobacteria; o_Myxococcales; f_0319-6G20; g_ ; s_                               |

|            |     |     |                                                                                                         |
|------------|-----|-----|---------------------------------------------------------------------------------------------------------|
| 822806     | 5   | 0   | p_Chloroflexi; c_Anaerolineae; o_SBR1031; f_A4b; g_ ; s_                                                |
| 590586     | 0   | 20  | p_Proteobacteria; c_Alphaproteobacteria; o_Rhodobacterales; f_Rhodobacteraceae; g_Paracoccus; s_        |
| 226053     | 0   | 16  | p_Cyanobacteria; c_Chloroplast; o_Streptophyta; f_ ; g_ ; s_                                            |
| 208315     | 0   | 4   | p_Cyanobacteria; c_Oscillatoriophycideae; o_Oscillatoriales; f_Phormidiaceae; g_Phormidium; s_          |
| 405425     | 0   | 1   | p_Proteobacteria; c_Gammaproteobacteria; o_Pseudomonadales; f_Moraxellaceae; g_Acinetobacter; s_        |
| 888396     | 0   | 7   | p_Proteobacteria; c_Betaproteobacteria; o_Burkholderiales; f_Comamonadaceae; g_ ; s_                    |
| 720353     | 0   | 9   | p_Proteobacteria; c_Betaproteobacteria; o_Burkholderiales; f_Comamonadaceae; g_Delftia; s_              |
| 1021984    | 0   | 4   | p_Proteobacteria; c_Deltaproteobacteria; o_Myxococcales; f_ ; g_ ; s_                                   |
| 150994     | 13  | 0   | p_Bacteroidetes; c_Sphingobacteriia; o_Sphingobacteriales; f_ ; g_ ; s_                                 |
| 278371     | 7   | 0   | p_Cyanobacteria; c_Oscillatoriophycideae; o_Oscillatoriales; f_Phormidiaceae; g_Phormidium; s_          |
| 1040713    | 0   | 6   | p_Actinobacteria; c_Actinobacteria; o_Actinomycetales; f_Corynebacteriaceae; g_Corynebacterium; s_      |
| denovo_123 | 0   | 1   | p_Proteobacteria; c_Gammaproteobacteria; o_Pseudomonadales; f_Moraxellaceae; g_Acinetobacter; s_        |
| denovo_124 | 0   | 1   | p_Proteobacteria; c_Gammaproteobacteria; o_Pseudomonadales; f_Moraxellaceae; g_Acinetobacter; s_        |
| denovo_32  | 0   | 2   | p_Proteobacteria; c_Gammaproteobacteria; o_Pseudomonadales; f_Moraxellaceae; g_Acinetobacter; s_        |
| denovo_33  | 0   | 1   | p_Proteobacteria; c_Gammaproteobacteria; o_Pseudomonadales; f_Moraxellaceae; g_Acinetobacter; s_        |
| 1076316    | 0   | 4   | p_Firmicutes; c_Bacilli; o_Bacillales; f_Staphylococcaceae; g_Staphylococcus; s_                        |
| 1060029    | 0   | 9   | p_Actinobacteria; c_Actinobacteria; o_Actinomycetales; f_Corynebacteriaceae; g_Corynebacterium; s_      |
| 582973     | 0   | 12  | p_Proteobacteria; c_Alphaproteobacteria; o_Sphingomonadales; f_Erythrobacteraceae; g_ ; s_              |
| 1008747    | 14  | 1   | p_Proteobacteria; c_Betaproteobacteria; o_Burkholderiales; f_Oxalobacteraceae; g_ ; s_                  |
| denovo_100 | 0   | 39  | p_Proteobacteria; c_Gammaproteobacteria; o_Pseudomonadales; f_Moraxellaceae; g_Acinetobacter; s_        |
| denovo_105 | 0   | 2   | p_Proteobacteria; c_Gammaproteobacteria; o_Pseudomonadales; f_Moraxellaceae; g_Acinetobacter; s_        |
| 545997     | 0   | 11  | p_Proteobacteria; c_Betaproteobacteria; o_Burkholderiales; f_Comamonadaceae; g_ ; s_                    |
| denovo_50  | 0   | 7   | p_Proteobacteria; c_Gammaproteobacteria; o_Pseudomonadales; f_Moraxellaceae; g_Acinetobacter; s_        |
| 593096     | 0   | 14  | p_Proteobacteria; c_Alphaproteobacteria; o_Rhodospirillales; f_Acetobacteraceae; g_ ; s_                |
| 607212     | 2   | 0   | p_Proteobacteria; c_Alphaproteobacteria; o_Sphingomonadales; f_Sphingomonadaceae; g_Sphingomonas; s_    |
| 900973     | 0   | 4   | p_Proteobacteria; c_Betaproteobacteria; o_Neisseriales; f_Neisseriaceae; g_ ; s_                        |
| 808758     | 20  | 0   | p_Proteobacteria; c_Alphaproteobacteria; o_Sphingomonadales; f_Sphingomonadaceae; g_Novosphingobium; s_ |
| Total      | 329 | 329 |                                                                                                         |

\* “Blank” negative DNA extraction/PCR controls (i.e., PCR products of template acquired from a sham extraction to which no rectal luminal sample is added).
